# Supplementary material
Source: PubMed Central journal article supplement (PMC3466118)
Supplement: NIHMS295016-supplement-supplemental.pdf [file NIHMS295016-supplement-supplemental.pdf]

# Supporting Information

## **Design, Synthesis, Docking, and Biological Evaluation of Novel Diazide-containing Isoxazole- and Pyrazole-based Histone Deacetylase Probes**

Raghupathi Neelarapu,<sup>†,§</sup> Denise L. Holzle,<sup>‡,§</sup> Subash Velaparthy,<sup>†,¶</sup> He Bai,<sup>†</sup> Michael Brunsteiner,<sup>†</sup> Sylvie Y. Blond,<sup>\*,‡,§,8</sup> and Pavel A. Petukhov<sup>\*,†</sup>

<sup>†</sup>Department of Medicinal Chemistry and Pharmacognosy, College of Pharmacy, University of Illinois at Chicago, 833 South Wood Street, Chicago, IL 60612, <sup>‡</sup>Center for Pharmaceutical Biotechnology, University of Illinois at Chicago, 900 South Ashland, Chicago, IL 60612, USA.

<sup>8</sup>UMRS-940, Institut Universitaire d'Hématologie (IUH) Saint Louis, Institut de Génétique Moléculaire, 27 rue Juliette Dodu, 75010 Paris, France. Present address for SV: Translational Chemistry & Medicine, Department of Chemistry, The Scripps Research Institute, 10550 North Torrey Pines Road (SP30-3156), La Jolla, CA. 92037, for MB: Research Center Pharmaceutical Engineering, Inffeldgasse 21a/II, 8010 Graz, Austria. <sup>§</sup>These authors contributed equally.

\*Corresponding authors: For PAP: phone, 312-996-4174; fax, 312-996-7107; e-mail, [pap4@uic.edu](mailto:pap4@uic.edu). For SYB: phone, +33 (0)1 42 49 48 78 ; fax, +33 (0)1 42 49 48 38 ; e-mail, [sylvie.blond@inserm.fr](mailto:sylvie.blond@inserm.fr)

### **Contents of SI:**

- HDAC1 and HDAC2 assay protocol S1
- Activity assays for HDACs 4–7 and 9–11 S2
- Activity assays for matrix metalloproteases (MMPs)-1, 3, 9, 14 S2
- References S3

**In-house HDAC1 and HDAC2 assay protocols:** In this assay, recombinant, full-length HDAC1 or HDAC2 (BPS Bioscience, San Diego, CA) was diluted to 40 ng (for HDAC1) or 50 ng (for HDAC2) with HDAC assay buffer (25 mM Tris-HCl, pH 8.0, 137 mM NaCl, 2.7 mM KCl, 1 mM MgCl<sub>2</sub>, 1 mg/mL BSA) and pre-incubated with 30  $\mu$ L of inhibitor for 5 min, then 10  $\mu$ L, 125  $\mu$ M of HDAC fluorophore-conjugated substrate Boc-L-Lys (Ac)-AMC (Chem-Impex, Wood Dale, IL) was added and the mixture incubated for 35 min (for HDAC1)/ 60 min (for HDAC2) at room temperature. The reaction was quenched with HDAC assay developer (1 mg/mL trypsin in 25 mM Tris-HCl, pH 8.0, 137 mM NaCl, 5  $\mu$ M TSA, 2.7 mM KCl, 1 mM MgCl<sub>2</sub>) for 30 min. The plate was read on an OptimaPolar Star microplate reader (BMG labtech) at excitation wavelength 360 nm and emission wavelength 460 nm. The IC<sub>50</sub> values were determined using the GraphPad Prism 5 software (GraphPad Software Inc., La Jolla, CA).

**Activity assays for HDACs 4–7 and 9–11:** These assays were performed by the Reaction Biology Corporation, Malvern, PA, using the Reaction Biology HDAC Spectrum platform, web-site [www.reactionbiology.com](http://www.reactionbiology.com).

The HDAC4, 5, 6, 7, 8, 9, 10, and 11 assays used isolated recombinant human proteins and a general substrate- fluorogenic peptide from p53 residues 379-382 (RHKKAc). Compounds were dissolved in DMSO and tested in a 10-dose IC<sub>50</sub> mode with 3-fold serial dilution starting at 100  $\mu$ M. Control compound Trichostatin A (TSA) was tested in a 10-dose IC<sub>50</sub> with 3-fold serial dilution starting at 10  $\mu$ M. IC<sub>50</sub> values were extracted by curve-fitting the dose/response slopes.

**Activity assays for matrix metallo-proteases (MMPs)-1, 3, 9, 14:** These assays were performed by the Reaction Biology Corporation, Malvern, PA, web-site [www.reactionbiology.com](http://www.reactionbiology.com).

Compounds were dissolved in DMSO and tested in a 10-dose IC<sub>50</sub> mode with 3-fold serial dilution starting at 100  $\mu$ M. Control compound galardin (GM6001)<sup>1</sup> was tested in a 10-dose IC<sub>50</sub> with 3-fold serial dilution starting at 100 nM. The protease activities were monitored as a time-course measurement of the increase in fluorescence signal from fluorescently-labeled peptide substrate, and initial linear portion of slope (signal/min) was analyzed. IC<sub>50</sub> values were extracted by curve-fitting the dose/response slopes.

**References:**

1. Santiskulvong, C., Rozengurt, E. Galardin (GM6001), a broad-spectrum matrix metalloproteinase inhibitor, blocks bombesin- and LPA-induced EGF receptor transactivation and DNA synthesis in rat-1 cells. *Exp. Cell Res.* **2003**, 290, 437–446.
